# Supplementary material for: Application of BCXZM Composite for Arsenic Removal: EPS Production, Biotransformation and Immobilization of Bacillus XZM on Corn Cobs Biochar
Source: MDPI journal article supplement (doi:10.3390/biology12040611), 2023-04-18
Supplement: s1 [file s1]

Table S1: Factors and levels for the (CCD) $2^2$  experiment of arsenic adsorption by BCXZM composite.

| Factor | Name  | Low Level | Middle Level | High Level |
|--------|-------|-----------|--------------|------------|
| A      | pH    | 4.5       | 5.75         | 7          |
| B      | As(V) | 15        | 30           | 45         |

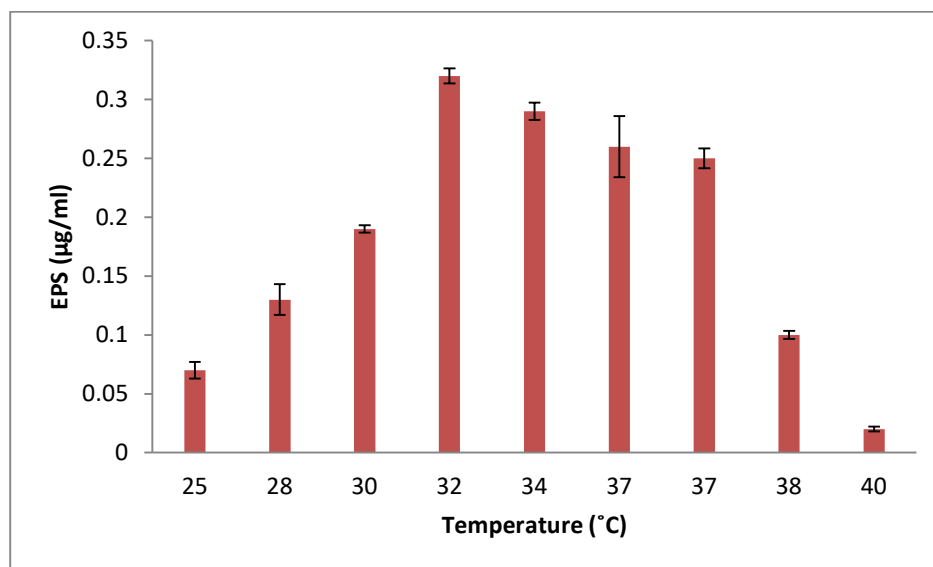

Figure S1: EPS formation by *Bacillus XZM* at different Temperature

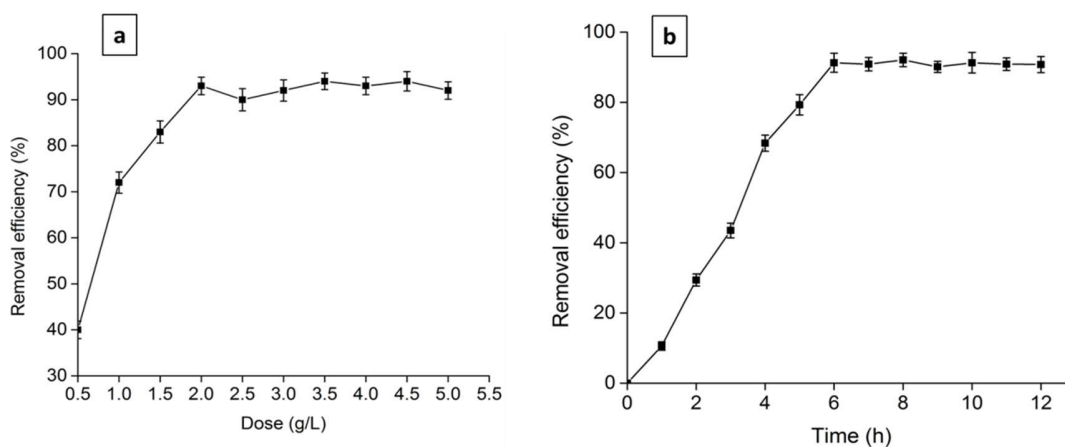

Figure S2: Removal efficiency of the As(V) at different a) dose of BCXZM composite and b) time interval while keeping dose of BCXZM at 2 g/L
